# Supplementary material
Source: PubMed Central journal article supplement (PMC8990970)
Supplement: 12325_2022_2056_MOESM1_ESM.pdf [file 12325_2022_2056_MOESM1_ESM.pdf]

## Supplementary Materials

### Continuity of care in the management of asthma attacks and relevance during a pandemic

Monica Fletcher<sup>1</sup>, Thys van der Molen<sup>2</sup>, Warren Lenney<sup>3</sup>, Isabelle Boucot,<sup>4</sup> Bhumika Aggarwal<sup>5</sup>, Emilio Pizzichini<sup>6</sup>

<sup>1</sup>The Usher Institute, University of Edinburgh, Edinburgh, UK

<sup>2</sup>Department of General Practice and GRIAG Research Institute, University Medical Center Groningen, University of Groningen, the Netherlands

<sup>3</sup> Department of Pharmacy and Bioengineering, University of Keele, Staffordshire, UK

<sup>4</sup>Respiratory, GlaxoSmithKline, Brentford, London, UK

<sup>5</sup>Respiratory, General Medicines Emerging Markets, GlaxoSmithKline, Singapore 139234, Singapore

<sup>6</sup>Respiratory, Global Medical Expert, GlaxoSmithKline, Brazil

Corresponding author: Monica Fletcher. The Usher Institute, University of Edinburgh, Edinburgh, UK. Email: [Monica.Fletcher@ed.ac.uk](mailto:Monica.Fletcher@ed.ac.uk)

Table S1. Treatment of acute attacks of asthma in primary care and acute care in adults and teenagers<sup>1,2,3</sup>

| Severity of attack      | Primary care management                                                                                                                                                                                                                                                                                                                                                                                                                                                                                        | Acute care facility management                                                                                                                                                                                                                                                                                                                                                                                                                                                                                                                                                                                                                                                                                                          |
|-------------------------|----------------------------------------------------------------------------------------------------------------------------------------------------------------------------------------------------------------------------------------------------------------------------------------------------------------------------------------------------------------------------------------------------------------------------------------------------------------------------------------------------------------|-----------------------------------------------------------------------------------------------------------------------------------------------------------------------------------------------------------------------------------------------------------------------------------------------------------------------------------------------------------------------------------------------------------------------------------------------------------------------------------------------------------------------------------------------------------------------------------------------------------------------------------------------------------------------------------------------------------------------------------------|
| <b>Life-threatening</b> | <ul style="list-style-type: none"> <li>• Urgent transfer to acute care facility</li> <li>• While waiting for transport, administer salbutamol (5mg) and ipratropium bromide (0.5 mg) via oxygen-driven nebuliser or via pMDI and spacer, commence prednisolone (40-50 mg) or hydrocortisone IV (100 mg), controlled oxygen therapy</li> <li>• Patient under close continuous observation of HCP in primary care facility until transport arrives</li> <li>• Written referral to ED/hospital</li> </ul>         | <ul style="list-style-type: none"> <li>• Most appropriately managed in acute care (e.g., ED or ICU)</li> <li>• Commence salbutamol 5 mg every 15–30 mins (or continuous administration 5–10 mg/h) via oxygen-driven nebuliser, add ipratropium bromide 0.5 mg 4–6 hourly, controlled oxygen therapy and oral prednisolone (or IV hydrocortisone 100 mg)</li> <li>• Measure ABGs</li> <li>• Discuss with senior clinician and ICU</li> <li>• Consider adding IV magnesium sulphate (1.2–2g over 20 min<sup>a</sup>)</li> <li>• Correct any fluid and electrolyte disturbances</li> <li>• Transfer to ICU for possible intubation and mechanical ventilation</li> </ul>                                                                   |
| <b>Severe</b>           | <ul style="list-style-type: none"> <li>• Transfer to an acute care facility</li> <li>• While waiting, administer salbutamol via oxygen-driven nebuliser (5 mg) or via pMDI and spacer, commence prednisolone (40-50 mg) or hydrocortisone IV (100 mg), controlled oxygen therapy (aim SaO<sub>2</sub> 93–95%), maximum 98%</li> <li>• Patient to remain under close continuous observation of a HCP in the primary care facility until transport arrives</li> <li>• Written referral to ED/hospital</li> </ul> | <ul style="list-style-type: none"> <li>• Most appropriately managed in ED, ICU or hospital ward</li> <li>• Commence salbutamol 5 mg every 15–30 mins via oxygen-driven nebuliser plus ipratropium bromide 0.5 mg 4–6 hourly, controlled oxygen therapy, and oral prednisolone (or IV hydrocortisone 100 mg)</li> <li>• Consider IV magnesium sulphate<sup>b</sup></li> <li>• Consider high-dose ICS within the first hour of presentation<sup>c</sup></li> <li>• Measure ABGs on initial presentation and after 1 hour</li> <li>• If continuing deterioration, discuss with senior clinician and ICU, treat as life-threatening and prepare for transfer to ICU</li> <li>• Monitor PEF 15–30 mins after initiating treatment</li> </ul> |

|                                |                                                                                                                                                                                                                                                                                                                                                                                                                                                                                                                                                                                                                                                                      |                                                                                                                                                                                                                                                                                                                                                                                                                                                                                                                                                                                                                                                                                                                                                                       |
|--------------------------------|----------------------------------------------------------------------------------------------------------------------------------------------------------------------------------------------------------------------------------------------------------------------------------------------------------------------------------------------------------------------------------------------------------------------------------------------------------------------------------------------------------------------------------------------------------------------------------------------------------------------------------------------------------------------|-----------------------------------------------------------------------------------------------------------------------------------------------------------------------------------------------------------------------------------------------------------------------------------------------------------------------------------------------------------------------------------------------------------------------------------------------------------------------------------------------------------------------------------------------------------------------------------------------------------------------------------------------------------------------------------------------------------------------------------------------------------------------|
| <p><b>Mild or Moderate</b></p> | <ul style="list-style-type: none"> <li>• Administer salbutamol (100 µg/actuation) inhaler via spacer and pMDI, OCS 40–50 mg (adult),</li> <li>• Consider controlled flow oxygen if hypoxemic (aim SaO<sub>2</sub> 93–95%, maximum 98%)</li> <li>• Monitor SaO<sub>2</sub> and observe patient (minimum 1 hour) within primary care facility</li> <li>• Consider transfer to acute care if symptoms fail to improve or deteriorate</li> <li>• Symptoms resolved, minimal need for SABA – patient can be sent home with OCS, follow-up appointment, asthma action plan and preventative and relief therapy (consider increasing regular ICS dose if needed)</li> </ul> | <ul style="list-style-type: none"> <li>• On presentation to ED, administer salbutamol (100 µg/actuation) inhaler via pMDI + spacer, or 5 mg via oxygen-driven nebuliser, consider adding ipratropium bromide 0.5 mg nebuliser 4–6 hourly, administer controlled oxygen (aim SaO<sub>2</sub> 93–95%, maximum 98%) if hypoxemic, and commence OCS</li> <li>• Measure lung function 1 hour after initial treatment</li> <li>• FEV<sub>1</sub>/PEF at least 50% predicted or PB<sup>d</sup>, normal physical examination, no distress, consider discharge home with primary care follow-up, asthma action plan and continued OCS</li> <li>• FEV<sub>1</sub>/PEF &lt;50% or continuing symptom deterioration, treat as severe and assess for hospital admission</li> </ul> |
|--------------------------------|----------------------------------------------------------------------------------------------------------------------------------------------------------------------------------------------------------------------------------------------------------------------------------------------------------------------------------------------------------------------------------------------------------------------------------------------------------------------------------------------------------------------------------------------------------------------------------------------------------------------------------------------------------------------|-----------------------------------------------------------------------------------------------------------------------------------------------------------------------------------------------------------------------------------------------------------------------------------------------------------------------------------------------------------------------------------------------------------------------------------------------------------------------------------------------------------------------------------------------------------------------------------------------------------------------------------------------------------------------------------------------------------------------------------------------------------------------|

ABG, arterial blood gas; ED, emergency department; FEV<sub>1</sub>, forced expiratory volume in 1 second; HCP, healthcare provider; ICS, inhaled corticosteroid; ICU, intensive care unit; IV, intravenous; OCS, oral corticosteroid; PB, personal best; PEF, peak expiratory flow; pMDI, pressurised metered-dose inhaler; SABA, short-acting β<sub>2</sub>-agonist; SaO<sub>2</sub>, saturated oxygen

<sup>a</sup>Doses stated as per BTS recommendation<sup>3</sup>; <sup>b</sup>Recommended in NAEPP<sup>1</sup> and GINA<sup>2</sup>; <sup>c</sup>Recommended in GINA only<sup>2</sup>; <sup>d</sup>NAEPP: >70%<sup>1</sup>, GINA 60-80%<sup>2</sup>, BTS: >50%<sup>3</sup>

Figure S1. Example asthma action plan<sup>4</sup>

Image reproduced with permission from Asthma UK. The full asthma action plan resource and most up-to-date version is available at <https://www.asthma.org.uk/advice/resources/>

### 1 Every day asthma care:

**My asthma is being managed well:**

- With this daily routine I should expect/aim to have no symptoms.
- If I have not had any symptoms or needed my reliever inhaler for at least 12 weeks, I can ask my GP or asthma nurse to review my medicines in case they can reduce the dose.
- My personal best peak flow is:

**My daily asthma routine:**

My **preventer** inhaler (insert name/colour):

I need to take my **preventer** inhaler every day even when I feel well.

I take  puff(s) in the morning and  puff(s) at night.

My **reliever** inhaler (insert name/colour):

I take my **reliever** inhaler only if I need to

I take  puff(s) of my reliever inhaler if any of these things happen:

- I'm wheezing
- My chest feels tight
- I'm finding it hard to breathe
- I'm coughing

**Other medicines and devices (e.g spacer, peak flow meter) I use for my asthma every day:**

### 2 When I feel worse:

**My asthma is getting worse if I'm experiencing any of these:**

- My symptoms are coming back (wheeze, tightness in my chest, feeling breathless, cough).
- I am waking up at night.
- My symptoms are interfering with my usual day-to-day activities (eg at work, exercising).
- I am using my reliever inhaler three times a week or more.
- My peak flow drops to below:

**⚠ URGENT! If you need your reliever inhaler more than every four hours, you need to take emergency action now. See section 3.**

**What I can do to get on top of my asthma now:**

If I haven't been using my preventer inhaler, I'll start using it regularly again or if I have been using it:

- Increase my preventer inhaler dose to  puffs  times a day until my symptoms have gone and my peak flow is back to my personal best.
- Take my reliever inhaler as needed (up to  puffs every four hours).
- Carry my reliever inhaler with me when I'm out.

**URGENT! See a doctor or nurse within 24 hours if you get worse at any time or you haven't improved after seven days.**

**Other advice from my GP about what to do if my asthma is worse (eg MART or rescue steroid tablets):**

### 3 In an asthma attack:

**I'm having an asthma attack if I'm experiencing any of these:**

- My reliever inhaler is not helping or I need it more than every four hours.
- I find it difficult to walk or talk.
- I find it difficult to breathe.
- I'm wheezing a lot, or I have a very tight chest, or I'm coughing a lot.
- My peak flow is below:

**What to do in an asthma attack**

- 1 Sit up straight** – try to keep calm.
- 2 Take one puff of your reliever inhaler (usually blue)** every 30 - 60 seconds, up to a maximum of 10 puffs.
- 3 If you feel worse** at any point OR you don't feel better after 10 puffs call 999 for an ambulance.
- 4 Repeat step 2 after 15 minutes** while you're waiting for an ambulance.

**After an asthma attack:**

- If you dealt with your asthma attack at home, see your GP today.
- If you were treated in hospital, see your GP within 48 hours of being discharged.
- Finish any medicines they prescribe you, even if you start to feel better.
- If you don't improve after treatment, see your GP urgently.

**What to do in an asthma attack if I'm on MART:**

## References

1. National Asthma Education and Prevention Program. *Expert Panel Report 3: guidelines for the diagnosis and management of asthma 2007*, <[https://www.nhlbi.nih.gov/sites/default/files/media/docs/asthgdln\\_1.pdf](https://www.nhlbi.nih.gov/sites/default/files/media/docs/asthgdln_1.pdf)> (2007). Global Initiative for Asthma. Global Strategy for Asthma Management and Prevention.
2. Global Initiative for Asthma (GINA), 2021. <https://ginasthma.org/gina-reports/>. Accessed 2 July 2021The British Thoracic Society.
3. *BTS/SIGN British guideline on the management of asthma*, 2019. <<https://www.brit-thoracic.org.uk/standards-of-care/guidelines/btssign-british-guideline-on-the-management-of-asthma/>>
4. Asthma UK. *Filling in patient's asthma action plans*, <<https://www.asthma.org.uk/globalassets/health-advice/resources/adults/adult-asthma-action-plan.pdf>> (2019). Accessed 16 September 2021.
